# Supplementary material for: GmFULc Is Induced by Short Days in Soybean and May Accelerate Flowering in Transgenic Arabidopsis thaliana
Source: MDPI journal article supplement (doi:10.3390/ijms221910333), 2021-09-25
Supplement: s1 [file s1]

**Table S1. Plant FUL proteins' information.**

| Species name                 | Accession number  |
|------------------------------|-------------------|
| <i>Arabidopsis thaliana</i>  | AT5G60910.1       |
| <i>Glycine max</i>           | Glyma.06G205800.1 |
| <i>Glycine max</i>           | Glyma.04G159300.1 |
| <i>Glycine max</i>           | Glyma.05G018800.2 |
| <i>Glycine max</i>           | Glyma.17G081200.1 |
| <i>Vigna unguiculata</i>     | XP_027922086.1    |
| <i>Cajanus cajan</i>         | XP_020227938.1    |
| <i>Abrus precatorius</i>     | XP_027333786.1    |
| <i>Cicer arietinum</i>       | XP_004508656.1    |
| <i>Pisum sativum</i>         | AFI08227.1        |
| <i>Lupinus albus</i>         | KAE9601902.1      |
| <i>Medicago secundiflora</i> | AFU81360.1        |

**Table S2. The specific sequences of the primers.**

| Primer                | Sequence (5'-3')                               |
|-----------------------|------------------------------------------------|
| <i>GmFULc-3F6H-F</i>  | TGGAGCTCGGTACCCATGGGGAGGGGAAGAGTG              |
| <i>GmFULc-3F6H-R</i>  | TCAGCAGGGATCCCCAATTCATTTGTAGGAAGAGG<br>CATC    |
| <i>GmRAV-3F6H-F</i>   | TGGAGCTCGGTACCCATGGATGGAGGCTGTGTCAC<br>AG      |
| <i>GmRAV-3F6H-R</i>   | GATCCTGGGATCCCCGACAAAGCTCCAATTACTTT<br>TAACTTC |
| <i>qAtTPL- ChIP-F</i> | TCTGTTAATGGAATCTAGCTGTTTC                      |
| <i>qAtTPL- ChIP-R</i> | TTGTGAACAGTCTCTTTAAACTTCT                      |
| <i>proTPL::LUC-F</i>  | GAATTCCTGCAGCCCTTTTAACAAAGTACAGTTTG<br>CTTTC   |
| <i>proTPL::LUC-R</i>  | ACTAGTGGATCCCCGTTTTCTCTCACTTCCTTAAA<br>AGAC    |

|                     |                           |
|---------------------|---------------------------|
| <i>qAtTPL -F</i>    | GAGTTTTATGGATGCAACAGTTTG  |
| <i>qAtTPL-R</i>     | TAGTGGATGTACGTTTGAATTGCT  |
| <i>qGmActin4 -F</i> | GTGTCAGCCATACTGTCCCCATT   |
| <i>qGmActin4-R</i>  | GTTTCAAGCTCTTGCTCGTAATCA  |
| <i>qGmFULc-F</i>    | GAGCAAGAAGGACTGCAAAATA    |
| <i>qGmFULc-R</i>    | TTGTAGGAAGAGGCATCAAAGG    |
| <i>qAtIPP2-F</i>    | TGAGCTTGGTATTGTAGCTGAA    |
| <i>qAtIPP2-R</i>    | GACAGTTTCAAACCTTCCTCAC    |
| <i>qAtCO-F</i>      | AAGGTGATAAGGATGCCAAGGAG   |
| <i>qAtCO-R</i>      | GGAGCCATATTTGATATTGAACTGA |
| <i>qAtFT-F</i>      | TGGTGGAGAAGACCTCAGGAAC    |
| <i>qAtFT-R</i>      | TGCCAAGCTGTGCGAAACAATAT   |
| <i>qAtSOC1-F</i>    | TCAGAACTTGGGCTACTC        |
| <i>qAtSOC1-R</i>    | TTCTCGTCGTCTCCGCCTCC      |
| <i>qAtLFY-F</i>     | TGTGAACATCGCTTGTCGTC      |
| <i>qAtLFY-R</i>     | TAATACCGCCAATAAGCC        |

---
